# Supplementary material for: Improved reversibility of lithium deposition and stripping with high areal capacity under practical conditions through enhanced wettability of the polyolefin separator to highly concentrated electrolytes
Source: Royal Society of Chemistry journal article supplement (doi:10.1039/d2ya00359g), 2023-01-01
Supplement: d2ya00359g1.pdf [file d2ya00359g1.pdf]

**Supplementary Information for**

**Improved Reversibility of Lithium Deposition and Stripping with High Areal  
Capacity under Practical Conditions through Enhanced Wettability of Polyolefin  
Separator to Highly Concentrated Electrolyte**

Yosuke Ugata,<sup>†,‡</sup> Chihaya Motoki,<sup>†</sup> Satoshi Nishikawa,<sup>§</sup> and Naoaki Yabuuchi<sup>\*,†,‡</sup>

<sup>†</sup>Department of Chemistry and Life Science, Yokohama National University, 79-5 Tokiwadai,  
Hodogaya-ku, Yokohama 240-8501, Japan

<sup>‡</sup>Advanced Chemical Energy Research Center (ACERC), Institute of Advanced Sciences, Yokohama  
National University, 79-5 Tokiwadai, Hodogaya-ku, Yokohama 240-8501, Japan

<sup>§</sup>Battery Materials Business Department, Teijin Limited, 2-1 Hinode-cho, Iwakuni, Yamaguchi 740-  
8511, Japan

\*CORRESPONDING AUTHOR

E-mail: yabuuchi-naoaki-pw@ynu.ac.jp

## Supporting Experimental Section

Battery-grade  $1 \text{ mol dm}^{-3}$   $\text{LiPF}_6$  in ethylene carbonate (EC)/dimethyl carbonate (DMC) (3:7 in v/v), LiFSA:DMC = 1:1.1 (mol/mol), and purified fluoroethylene carbonate (FEC) were purchased from Kishida Chemical. FEC at 2 vol% was added to 1 M  $\text{LiPF}_6$  in EC/DMC in an Ar-filled glovebox.

The aramid-coated polyolefin separator was prepared by slurry coating method. A meta-aramid/*N,N*-dimethylacetamide (DMAc) slurry containing dispersed  $\text{BaSO}_4$  filler with an average particle size of 50 nm was prepared. The slurry was coated on both sides of the polyolefin microporous membrane (film thickness: 7  $\mu\text{m}$ ). Then, it was immersed in a mixture of DMAc/water (50/50 wt.) and subsequently rinsed with water and dried to form aramid-based porous layers containing  $\text{BaSO}_4$  filler on both sides of the polyolefin microporous membrane. The thickness of the resulting aramid-coated polyolefin separator is approximately 11  $\mu\text{m}$ .

Attenuated total reflection Fourier transform infrared (ATR-FTIR) spectra of the separators were recorded using a FTIR spectrometer (FT/IR-6200, JASCO) with an ATR accessory (ATR PRO450-S, Pike JASCO) with a diamond prism at an incident angle of  $45^\circ$  at room temperature.

Chronopotentiometry was performed using two-electrode electrochemical cells (TJ-AC, Tomcell Japan) with the configuration of [Li/electrolyte/Cu], which were assembled in the Ar-filled glovebox. A disk-shaped Li-metal foil ( $\varphi = 12 \text{ mm}$ , Honjo Metal) was used as a counter electrode. Cu foil was used as a working electrode. A glass fiber filter (GB-100R, Advantec), polypropylene microporous membrane (Celgard2500, Celgard), and aramid-coated polypropylene membrane was used as separator between the working and counter electrodes. The cells were cycled at a current density of  $0.35 \text{ mA cm}^{-2}$  at room temperature.

The Li deposit on the Cu electrode was observed using a scanning electron microscope (SEM; SU8010, Hitachi High-Technologies). Li metal was deposited ( $2.1 \text{ mA h cm}^{-2}$ ) on the Cu electrode in Li/Cu cells with different electrolyte, and then the cells were disassembled in the Ar-filled glovebox. The Cu electrode was rinsed with DMC to remove the residual electrolyte components and dried under

vacuum. The sample was transferred to the SEM chamber using a transfer vessel without air exposure.

## Supporting Tables and Figures

**Table S1.** Peak assignment of the ATR-FTIR spectrum for the polyolefin separator.

| Wavenumber /<br>cm <sup>-1</sup> | Vibrational mode                                                     |
|----------------------------------|----------------------------------------------------------------------|
| 2952                             | CH <sub>3</sub> asymmetric stretching                                |
| 2920                             | CH <sub>2</sub> asymmetric stretching                                |
| 2871                             | CH <sub>3</sub> symmetric stretching                                 |
| 2841                             | CH <sub>2</sub> symmetric stretching                                 |
| 1456                             | CH <sub>3</sub> asymmetric deformation or CH <sub>2</sub> scissoring |
| 1375                             | CH <sub>3</sub> symmetric deformation                                |

**Table S2.** Peak assignment of the ATR-FTIR spectrum for the aramid-coated polyolefin separator.

| Wavenumber /<br>cm <sup>-1</sup> | Vibrational mode                                |
|----------------------------------|-------------------------------------------------|
| 1656                             | amide C=O stretching                            |
| 1608                             | aromatic C–C skeleton vibration                 |
| 1538                             | N–H deformation and C–N stretching coupled mode |
| 1481                             | aromatic C=C stretching                         |

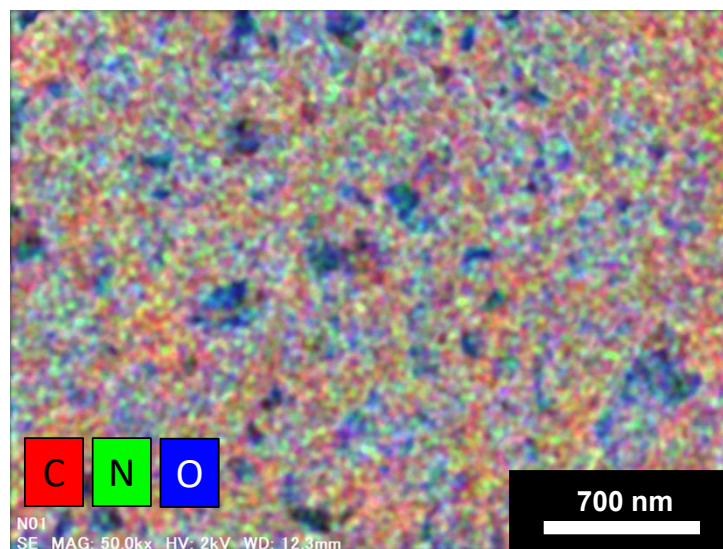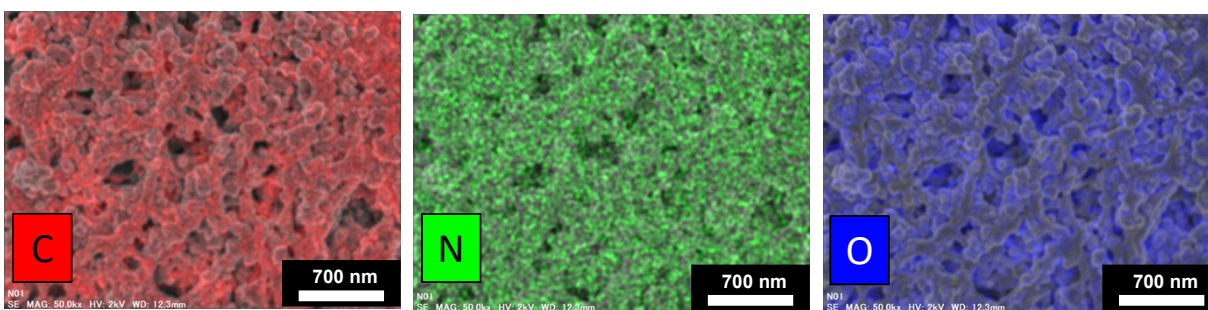

**Fig. S1.** SEM/EDX image of the aramid-coated polyolefin separator.

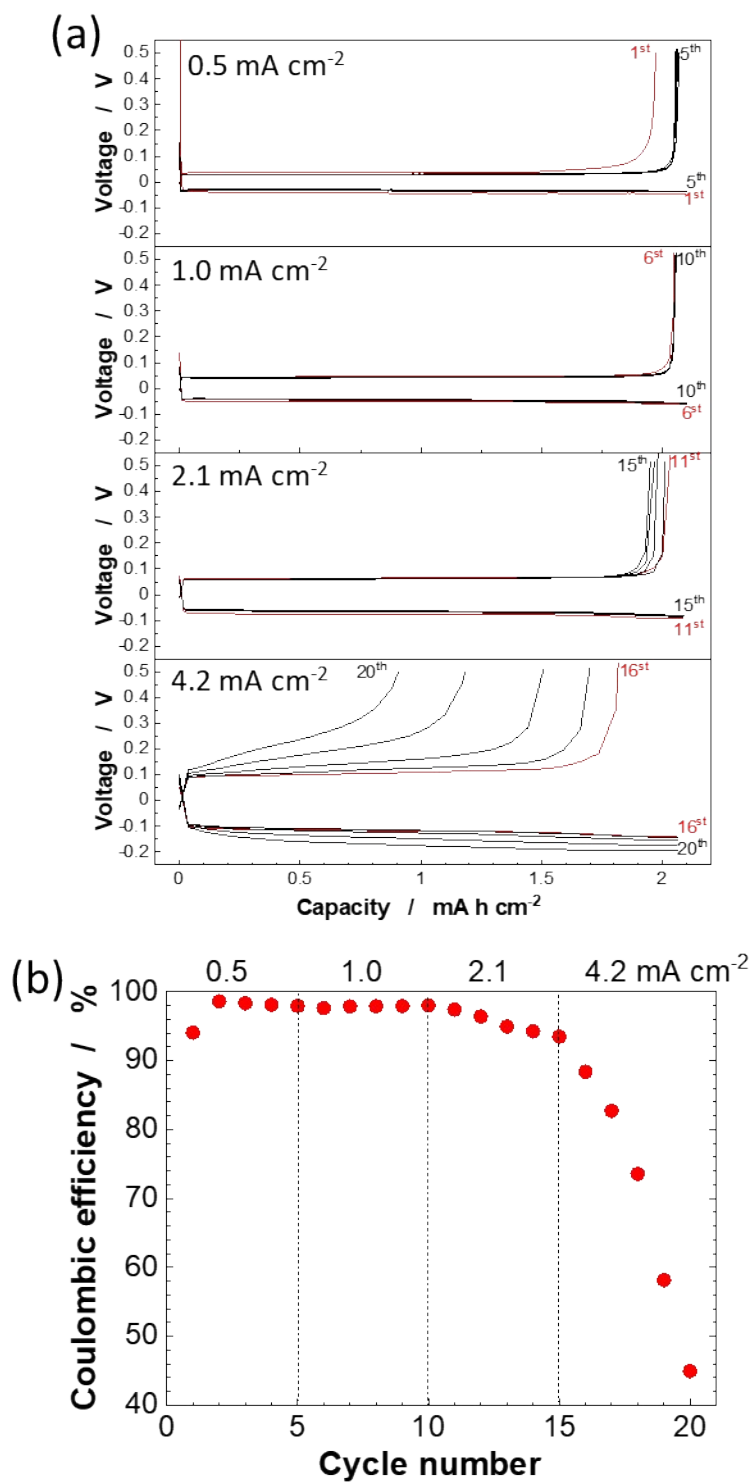

**Fig. S2.** (a) Chronopotentiometric curves of Li deposition/stripping in a Li/Cu cell with an aramid-coated separator and LiFSA:DMC = 1:1.1 electrolyte solution measured at various current densities. The Li deposition capacity was fixed at 2.1 mA h cm<sup>-2</sup>. Coulombic efficiency of the cell is also shown in (b).

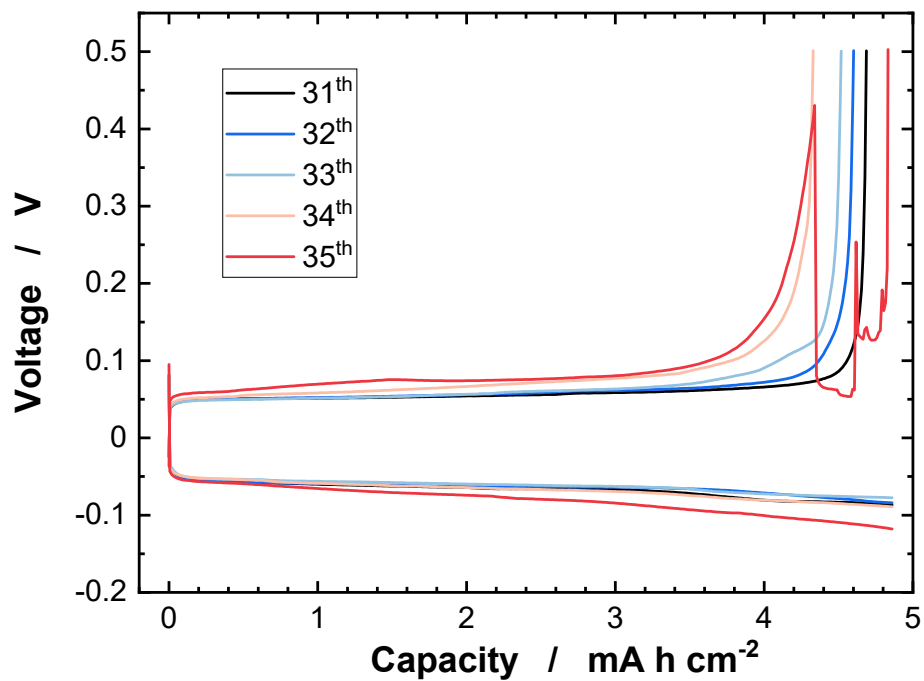

**Fig. S3.** Chronopotentiometric curves of Li deposition/stripping in Li/Cu cells with the aramid-coated separator at a current density of  $0.35 \text{ mA cm}^{-2}$  with Li deposition capacity of  $4.9 \text{ mA h cm}^{-2}$ .
